# Supplementary material for: Two- and four-probe field-effect and Hall mobilities in transition metal dichalcogenide field-effect transistors
Source: Royal Society of Chemistry journal article supplement (doi:10.1039/c6ra14638d), 2016-01-01
Supplement: c6ra14638d1.pdf [file c6ra14638d1.pdf]

## Supporting Information

### **Two- and four-probe field-effect and Hall mobilities in transition metal dichalcogenides field-effect transistors**

Ghazanfar Nazir, Muhammad Farooq Khan, Volodymyr M. Iermolenko, Jonghwa Eom\*

Department of Physics & Astronomy and Graphene Research Institute, Sejong University,  
Seoul 05006, Korea

E-mail: eom@sejong.ac.kr

## Atomic Force Microscopy

Atomic force microscopy (AFM) was performed to investigate the thickness and the surface morphology of WS<sub>2</sub> and MoS<sub>2</sub> films. Figs. S1a and S1b show the surface topology for WS<sub>2</sub> and MoS<sub>2</sub> flakes, respectively. AFM was conducted under tapping mode in ambient condition. Figs. S1c and S1d show height profiles, in which the thickness of WS<sub>2</sub> was ~10 nm and that of MoS<sub>2</sub> was ~14 nm. Both flakes were multilayer films.

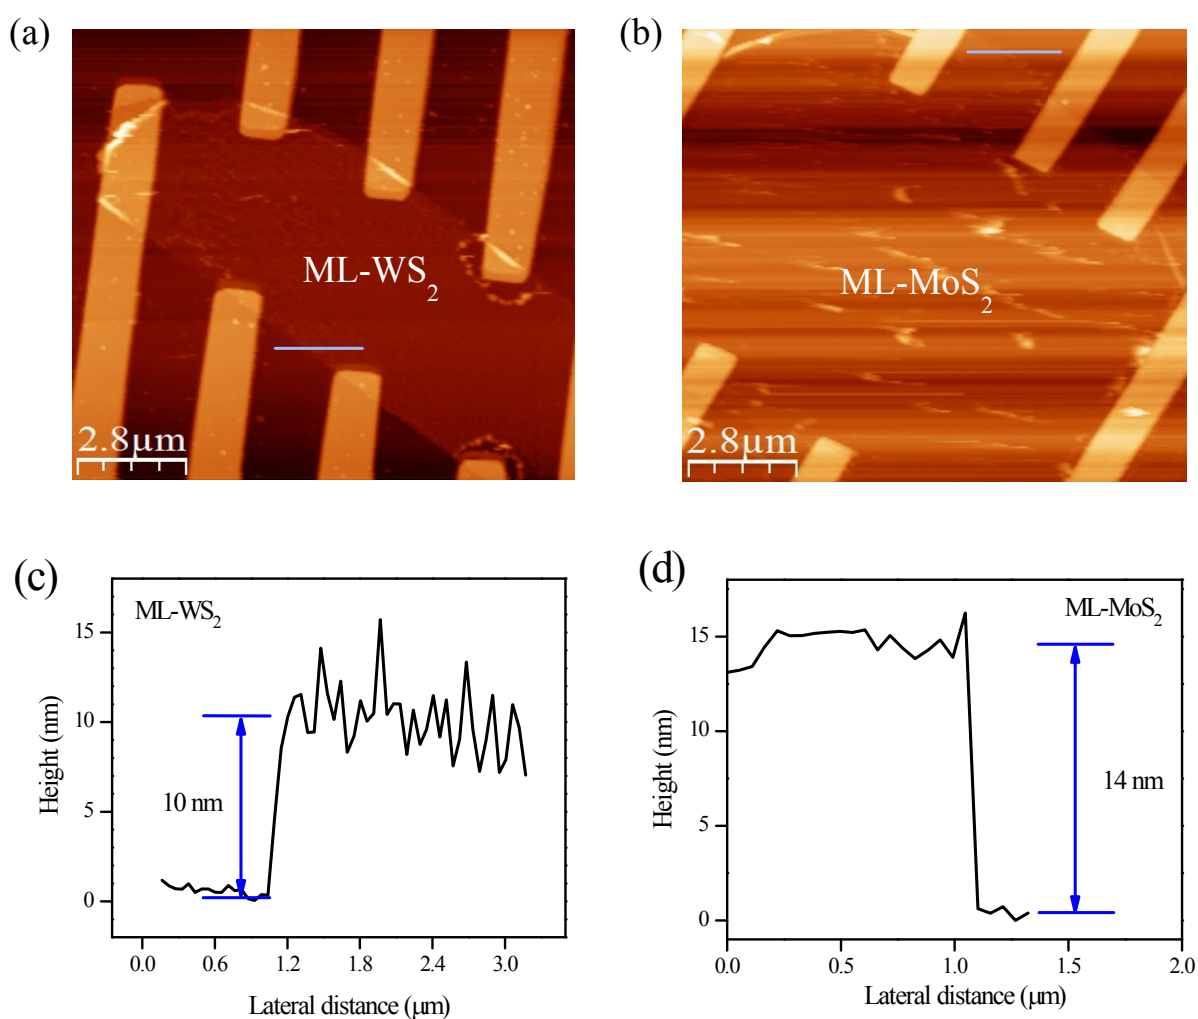

**Fig. S1** Atomic force microscopy image of (a) WS<sub>2</sub> and (b) MoS<sub>2</sub> flakes. (c) Height profile along the gray line for WS<sub>2</sub> flake. (d) Height profile along the gray line for MoS<sub>2</sub> flake.

## Raman spectroscopy

Raman spectroscopy provides very useful information about the number of layers of samples and the quality of films. Figs. S2a and S2b show the Raman shift for WS<sub>2</sub> and MoS<sub>2</sub> flakes. Both samples (WS<sub>2</sub> and MoS<sub>2</sub>) showed two optical phonon modes for WS<sub>2</sub> at 352 and 420 cm<sup>-1</sup> and for MoS<sub>2</sub> at 384 and 408 cm<sup>-1</sup> for the in-plane E<sub>2g</sub><sup>1</sup> and out-of-plane A<sub>1g</sub> vibrations, respectively<sup>1, 2</sup>. The variation in relative peak intensity ratios E<sub>2g</sub><sup>1</sup>/A<sub>1g</sub> and the frequency difference between E<sub>2g</sub><sup>1</sup> and A<sub>1g</sub> modes strongly depend on layer thickness<sup>1</sup>. To analyze the spectra, Lorentzian curve fitting was conducted for both WS<sub>2</sub> and MoS<sub>2</sub> flakes to measure peak intensities and locations of E<sub>2g</sub><sup>1</sup> and A<sub>1g</sub>. The peak difference between A<sub>1g</sub> and E<sub>2g</sub><sup>1</sup> modes ( $\Delta = A_{1g} - E_{2g}^1$ ) was nearly 68 cm<sup>-1</sup> for WS<sub>2</sub><sup>1, 3</sup> and 24 cm<sup>-1</sup> for MoS<sub>2</sub><sup>1, 4, 5</sup>; these results indicated that both samples were multilayer films.

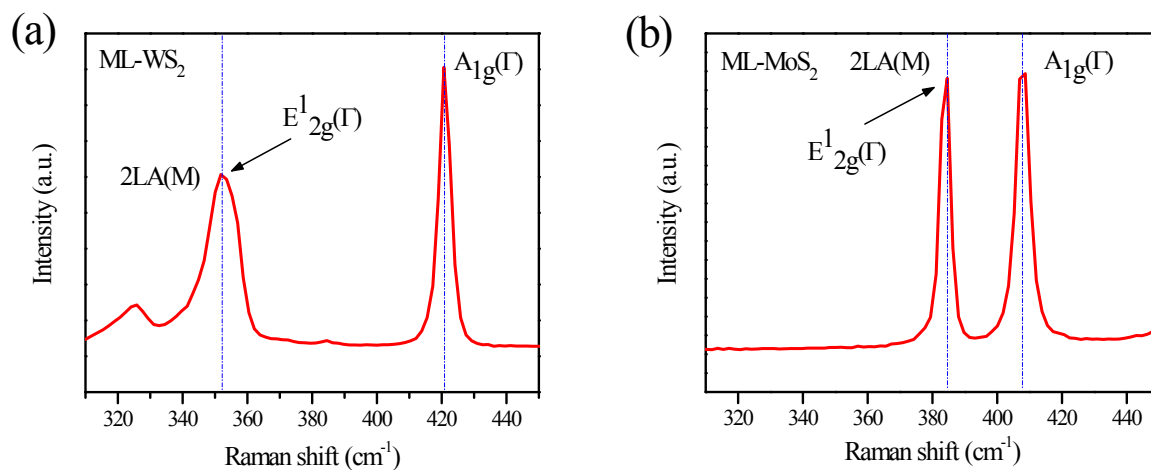

**Fig. S2** Raman spectroscopy of (a) WS<sub>2</sub> and (b) MoS<sub>2</sub> flakes at room temperature using laser with wavelength of 514 nm.

## Contact Resistance

We measured contact resistance for both WS<sub>2</sub> and MoS<sub>2</sub> samples using the transmission line method. Figs. S3a and S3b show the plots of specific resistance ( $\rho = R \times W$ ) for WS<sub>2</sub> and MoS<sub>2</sub>, respectively. Total specific resistance for the WS<sub>2</sub> or MoS<sub>2</sub> samples can be given by the following formula:

$$\rho_{\text{total}} = \rho_{\text{channel}} + 2\rho_{\text{c}}$$

where  $\rho_{\text{channel}}$  indicates channel specific resistance, and  $\rho_{\text{c}}$  represents contact resistance at metal/semiconductor junctions for both devices. Specific contact resistance was measured by linear fitting the curve of  $\rho_{\text{channel}}$  at a certain  $V_{\text{bg}}$ , which was set at 60 V. We measured the specific contact resistance for WS<sub>2</sub> and MoS<sub>2</sub> films at 3 and 13.5 k $\Omega \cdot \mu\text{m}$  respectively<sup>6, 7</sup>.

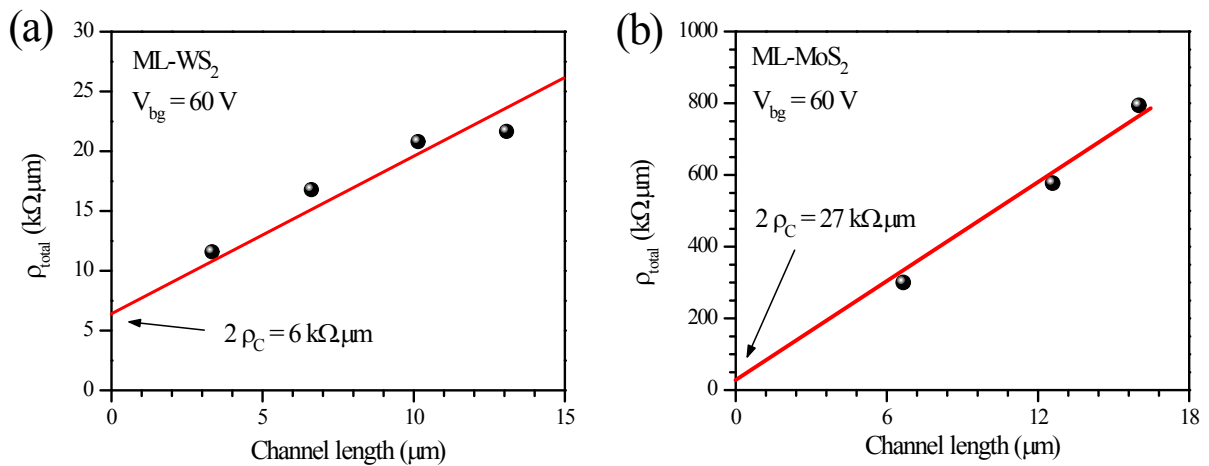

**Fig. S3** Total specific resistance as a function of channel length for multilayer (a) WS<sub>2</sub> and (b) MoS<sub>2</sub> films using the transmission line method. The specific contact resistance is estimated as 3 k $\Omega \cdot \mu\text{m}$  for WS<sub>2</sub> and 13.5 k $\Omega \cdot \mu\text{m}$  for MoS<sub>2</sub>.

## References

1. W. Zhao, Z. Ghorannevis, K. K. Amara, J. R. Pang, M. Toh, X. Zhang, C. Kloc, P. H. Tan and G. Eda, *Nanoscale*, 2013, **5**, 9677-9683.
2. A. L. Elias, N. Perea-López, A. Castro-Beltrán, A. Berkdemir, R. Lv, S. Feng, A. D. Long, T. Hayashi, Y. A. Kim and M. Endo, *ACS nano*, 2013, **7**, 5235-5242.
3. H. Zeng, G.-B. Liu, J. Dai, Y. Yan, B. Zhu, R. He, L. Xie, S. Xu, X. Chen and W. Yao, *Scientific reports*, 2013, **3**, 1608.
4. D. Kiriya, M. Tosun, P. Zhao, J. S. Kang and A. Javey, *Journal of the American Chemical Society*, 2014, **136**, 7853-7856.
5. H. Li, Q. Zhang, C. C. R. Yap, B. K. Tay, T. H. T. Edwin, A. Olivier and D. Baillargeat, *Advanced Functional Materials*, 2012, **22**, 1385-1390.
6. H. M. Khalil, M. F. Khan, J. Eom and H. Noh, *ACS applied materials & interfaces*, 2015, **7**, 23589-23596.
7. S. Kim, A. Konar, W. S. Hwang, J. H. Lee, J. Lee, J. Yang, C. Jung, H. Kim, J. B. Yoo, J. Y. Choi, Y. W. Jin, S. Y. Lee, D. Jena, W. Choi and K. Kim, *Nature communications*, 2012, **3**, 1011.
